# Supplementary material for: Horses in the Early Medieval (10th–13th c.) Religious Rituals of Slavs in Polish Areas—An Archaeozoological, Archaeological and Historical Overview
Source: MDPI journal article supplement (doi:10.3390/ani12172282), 2022-09-03
Supplement: s1 [file s1]

Table S1

List of sites with horse remains analyzed in the project entitled 'Horse in Poland in the Early Piasts and Internal Fragmentation'

| No  | Locality/site            | Chronology           | Province             | Community           |
|-----|--------------------------|----------------------|----------------------|---------------------|
| 1.  | Baldram, 1               | 10th – 11th          | pomorskie            | Kwidzyn             |
| 2.  | Bardy                    | 7th – 9th/10th       | zachodniopomorskie   | Dygowo              |
| 3.  | Biała Góra, 3            | late 12th – mid 15th | pomorskie            | Sztum               |
| 4.  | Białogard, 1             | late 6th – mid 13th  | zachodniopomorskie   | loco                |
| 5.  | Bielsk Podlaski, Zamkowa | 10th – 13th          | podlaskie            | loco                |
| 6.  | Biskupin, 4              | 10th – 13th          | wielkopolskie        | Gąsawa              |
| 7.  | Bnin                     | 10th – 15th          | wielkopolskie        | Kórnik              |
| 8.  | Bobrowo, 1               | 9th – mid 11th       | kujawsko – pomorskie | Bobrowo             |
| 9.  | Bocheń                   | 8th – 9th            | łódzkie              | Łowicz              |
| 10. | Bonikowo, 1              | 8th – 10th           | wielkopolskie        | Kościan             |
| 11. | Bonikowo, 2              | 6th – 10th           | wielkopolskie        | Kościan             |
| 12. | Brodnica – Michałowo, 1  | 10th – 13th          | kujawsko – pomorskie | Brodnica            |
| 13. | Brodno                   | 10th – 12th          | dolnośląskie         | Środa Śląska        |
| 14. | Bródno Stare, 1          | 10th – 13th          | mazowieckie          | Warszawa            |
| 15. | Bruszczewo, 12           | 9th – mid 10th       | wielkopolskie        | Śmigiel             |
| 16. | Bruszczewo, 13           | mid 11th – mid 10th  | wielkopolskie        | Śmigiel             |
| 17. | Brzeźno, 1               | 7th – 10th/11th      | zachodniopomorskie   | Barwice             |
| 18. | Busówno                  | 9th – 13th           | lubelskie            | Wierzbica           |
| 19. | Bydgoszcz, stan. 1       | 11th – 14th          | kujawsko – pomorskie | loco                |
| 20. | Cedynia, 1               | 9th – 12th           | zachodniopomorskie   | loco                |
| 21. | Charzykowy, 1 – 2        | 8th – 10th           | pomorskie            | Chojnice            |
| 22. | Chełm, Wysoka Górka, S   | 13th – 14th          | lubelskie            | loco                |
| 23. | Chełmno, 4 (434)         | 9th – late 13th      | wielkopolskie        | Dąbie               |
| 24. | Chlebnia, 3              | 11th – 12th          | mazowieckie          | Grodzisk Mazowiecki |
| 25. | Chmielno, 1              | 10th – 13th          | pomorskie            | Chmielno            |
| 26. | Chojnice, 1              | 8th – 10th           | pomorskie            | loco                |
| 27. | Chycina, 19              | 10th – 13th          | lubuskie             | Bledzew             |
| 28. | Cieple, IV               | 11th                 | pomorskie            | Gniew               |

| No  | Locality/site            | Chronology           | Province              | Community  |
|-----|--------------------------|----------------------|-----------------------|------------|
| 29. | Czeladź Wielka           | 6th – 13th           | dolnośląskie          | Wąsosz     |
| 30. | Czerchów, 1              | 9th – 11th           | łódzkie               | Ozorków    |
| 31. | Czermno Kolonia, 3       | 12th – 13th          | lubelskie             | Tyszowce   |
| 32. | Czermno, 1 – 3           | late 10th – 13th     | lubelskie             | Tyszowce   |
| 33. | Czersk, 1                | 9th/10th – 14th      | mazowieckie           | loco       |
| 34. | Czerwona Wieś, 1         | late 10th – mid 11th | wielkopolskie         | Krzywiń    |
| 35. | Czułczyce, 2             | 9th – 14th           | lubelskie             | Sawin      |
| 36. | Daleszryn, 2             | 9th/10th – 13th      | wielkopolskie         | Gostyń     |
| 37. | Dąbrówka, 1              | 13th – 14th          | wielkopolskie         | Dopiewo    |
| 38. | Dąbrówka, 2              | k. 8th – mid 11th    | wielkopolskie         | Dopiewo    |
| 39. | Derczewo, 3              | late 6th – mid 8th   | zachodniopomorskie    | Myślibórz  |
| 40. | Dobromierz               | 9th – 10th           | dolnośląskie          | loco       |
| 41. | Dobrzyń nad Wisłą, 1     | 9th – 15th           | kujawsko – pomorskie  | loco       |
| 42. | Dzieskanowice, 22        | late 10th – 12th     | wielkopolskie         | Łubowo     |
| 43. | Elbląg – Stare Miasto    | late 13th            | warmińsko – mazurskie | Elbląg     |
| 44. | Elbląg – Zamek, 1        | end 13th – 19th      | warmińsko – mazurskie | Elbląg     |
| 45. | Gardziec                 | 9th – 12th           | zachodniopomorskie    | Przelewice |
| 46. | Gdańsk, 1 (1000 – 1020)  | 11th – 13th          | pomorskie             | loco       |
| 47. | Gdańsk, 10 (1230 – 1308) | 9th – 13th           | pomorskie             | loco       |
| 48. | Gdańsk, 2 (1210 – 1230)  | 13th – 14th          | pomorskie             | loco       |
| 49. | Gdańsk, 4 (1255 – 1275)  | 13th                 | pomorskie             | loco       |
| 50. | Gdańsk, Plac Heweliusza  | 11th – 13th          | pomorskie             | loco       |
| 51. | Gdańsk, ul. Grodzka      | late 11th – mid 14th | pomorskie             | loco       |
| 52. | Gdańsk, ul. Olejarna     | 13th – 15th          | pomorskie             | loco       |
| 53. | Giecz                    | 9th – 14th           | wielkopolskie         | Dominowo   |
| 54. | Gilów                    | 9th – 10th           | dolnośląskie          | Niemcza    |
| 55. | Głuchowo, 1              | 9th – 1 half 13th    | wielkopolskie         | Komorniki  |
| 56. | Gniew – Stare Miasto, 2  | late 11th – 13th     | pomorskie             | Gniew      |
| 57. | Gniew, 3                 | late 11th – 13th     | pomorskie             | Gniew      |

| No  | Locality/site          | Chronology             | Province              | Community       |
|-----|------------------------|------------------------|-----------------------|-----------------|
| 58. | Gniew, 5               | end 9th – 10th/11th    | pomorskie             | Gniew           |
| 59. | Gniezno, 13b           | late 10th – mid 11th   | wielkopolskie         | Gniezno         |
| 60. | Gniezno, 14            | 10th – 13th            | wielkopolskie         | Gniezno         |
| 61. | Gniezno, 15            | late 9th – 13th        | wielkopolskie         | Gniezno         |
| 62. | Gniezno, 15a – d       | 9th – 13th             | wielkopolskie         | Gniezno         |
| 63. | Gniezno, 17a           | 11th/12th – 12th       | wielkopolskie         | Gniezno         |
| 64. | Gniezno, 22            | early 10th – 13th/14th | wielkopolskie         | Gniezno         |
| 65. | Gniezno, 43            | 10th – 13th            | wielkopolskie         | loco            |
| 66. | Gniezno, 5             | 10th – 13th            | wielkopolskie         | Gniezno         |
| 67. | Gniezno, 51            | 11th – 12th            | wielkopolskie         | loco            |
| 68. | Gniezno, 7a            | 11th – 12th            | wielkopolskie         | Gniezno         |
| 69. | Gniezno, 7c            | 9th – 13th/14th        | wielkopolskie         | loco            |
| 70. | Gniezno – Piotrowo, 40 | early 10th – 14th      | wielkopolskie         | loco            |
| 71. | Goleńczewo, 26         | late 11th – mid 12th   | wielkopolskie         | Suchy Las       |
| 72. | Gorzędziej, 1          | 9th – 13th/14th        | pomorskie             | Subkowy         |
| 73. | Góra, 1                | 6th/7th – 8th/9th      | wielkopolskie         | Pobiedziska     |
| 74. | Góra, 2                | 6th/7th – 8th/9th      | wielkopolskie         | Pobiedziska     |
| 75. | Górzycy, 1             | 7th – late 12th        | lubuskie              | loco            |
| 76. | Górzycy, 20            | 10th – early 11th      | lubuskie              | loco            |
| 77. | Grążawy, 1             | 11th/12th – half 13th  | kujawsko – pomorskie  | Bartniczka      |
| 78. | Grążawy, 2             | 11th/12th – half 13th  | kujawsko – pomorskie  | Bartniczka      |
| 79. | Grodzisko, 1           | 8th? – 13th?           | warmińsko – mazurskie | Banie Mazurskie |
| 80. | Grodziszczce, 1        | 9th – half 10th        | lubuskie              | Świebodzin      |
| 81. | Gronowo, 1             | 8th – 11th/12th        | kujawsko – pomorskie  | Lubicz          |
| 82. | Gronowo, 2             | late 7th – 11th/12th   | kujawsko – pomorskie  | Lubicz          |
| 83. | Grotniki, 6            | 11th – 13th            | wielkopolskie         | Włoszakowice    |
| 84. | Grudusk, 1             | 10th – 14th            | mazowieckie           | loco            |
| 85. | Grudziądz, 1           | 11th                   | kujawsko – pomorskie  | loco            |
| 86. | Grzybowo, 1            | mid 11th – 11th/12th   | wielkopolskie         | Września        |

| No   | Locality/site            | Chronology            | Province              | Community  |
|------|--------------------------|-----------------------|-----------------------|------------|
| 87.  | Gutowo, 1                | 12th/13th             | warmińsko – mazurskie | Lubawa     |
| 88.  | Gwieździn, 1             | 9th – 12th w          | pomorskie             | Rzeczenica |
| 89.  | Horodyszcze, 3           | 8th – 11th            | lubelskie             | Wisznice   |
| 90.  | Iłża, 1                  | 11th – 12th           | mazowieckie           | loco       |
| 91.  | Iłża, 2                  | 11th – 12th           | mazowieckie           | loco       |
| 92.  | Inowrocław, 18           | 13th – 14th           | kujawsko – pomorskie  | loco       |
| 93.  | Inowrocław, 19           | 13th – 14th           | kujawsko – pomorskie  | loco       |
| 94.  | Inowrocław, 20           | 11th – 12th           | kujawsko – pomorskie  | loco       |
| 95.  | Inowrocław, 2a           | 11th – 12th           | kujawsko – pomorskie  | loco       |
| 96.  | Janów Pomorski, 1        | late 8th – mid 10th   | warmińsko – mazurskie | Elbląg     |
| 97.  | Jastrowo – Ostrolesie, 1 | 9th – mid 10th        | wielkopolskie         | Szamotuły  |
| 98.  | Jedwabno, 1              | 11th – 14th           | kujawsko – pomorskie  | Lubicz     |
| 99.  | Jedwabno, 2              | 7th/8th – 11th/12th   | kujawsko – pomorskie  | Lubicz     |
| 100. | Jeziorko                 | 10th – mid 13th       | warmińsko – mazurskie | Ryn        |
| 101. | Jordanowo, 7             | 11th – early 13th     | lubuskie              | Świebodzin |
| 102. | Junkrowy, 1              | 8th – mid 13th        | pomorskie             | Skarszewy  |
| 103. | Kaczyce, 23              | 11th – 13th           | świętokrzyskie        | Lipnik     |
| 104. | Kalisz – Zawodzie        | 9th – 14th            | wielkopolskie         | loco       |
| 105. | Kałdus, 1                | late 10th – mid 13th  | kujawsko – pomorskie  | Chełmno    |
| 106. | Kałdus, 2                | late 7th – mid 13th   | Kujawsko – pomorskie  | Chełmno    |
| 107. | Kałdus, 3                | late 7th – 13th/14th  | kujawsko – pomorskie  | Chełmno    |
| 108. | Kałdus, 4                | 10th/11th – mid 11th  | kujawsko – pomorskie  | Chełmno    |
| 109. | Kamień Pomorski          | 10th – 13th           | zachodniopomorskie    | loco       |
| 110. | Kaszowo, 1               | late 10th – 11th      | dolnośląskie          | Milicz     |
| 111. | Kąsinowo                 | 11th                  | wielkopolskie         | Szamotuły  |
| 112. | Kędrzyno 1               | late 8th – 9th        | zachodniopomorskie    | Siemyśl    |
| 113. | Klenica, 4               | 9th – 11th            | lubuskie              | Bojadła    |
| 114. | Kołobrzeg – Budzistowo 1 | half 9th – early 11th | zachodniopomorskie    | loco       |
| 115. | Konikowo, 1 i 2          | early medieval        | warmińsko – mazurskie | Gołdap     |

| No   | Locality/site         | Chronology             | Province             | Community           |
|------|-----------------------|------------------------|----------------------|---------------------|
| 116. | Kozanki Podleśne 1    | 9th – 12th             | łódzkie              | Świnice Warckie     |
| 117. | Kraków – Sukiennice   | 11th/12th              | małopolskie          | loco                |
| 118. | Kępask                | 8th – 10th             | pomorskie            | Człuchów            |
| 119. | Krosno Odrzańskie     | 11th – 13th            | lubuskie             | loco                |
| 120. | Kruszwica, 2          | 9th – 14th             | wielkopolskie        | loco                |
| 121. | Kruszwica, 4          | 10th – 13th            | wielkopolskie        | loco                |
| 122. | Kruszwica 5           | 9th – 13th             | wielkopolskie        | loco                |
| 123. | Kruszwica, 9          | 8th – 12th             | kujawsko – pomorskie | loco                |
| 124. | Krzyżowniki, 16       | late 10th – early 12th | wielkopolskie        | loco                |
| 125. | Kulczyn Kolonia, 8    | 10th – 11th            | lubelskie            | Hańsk               |
| 126. | Ląd, 1                | 10th – 13th            | wielkopolskie        | Lądek               |
| 127. | Legnica               | 7th/8th                | dolnośląskie         | loco                |
| 128. | Lembarg, 6            | late 10th – mid 11th   | kujawsko – pomorskie | Jabłonowo Pomorskie |
| 129. | Lubieszewo, 1         | 10th                   | zachodniopomorskie   | Złocieniec          |
| 130. | Lubin 1               | 11th – 14th            | zachodniopomorskie   | loco                |
| 131. | Lubiń, 1              | late 11th – 14th       | wielkopolskie        | Krzywiń             |
| 132. | Lubiszewo             | 9th – 11th             | pomorskie            | Tczew               |
| 133. | Lubniewice, 10        | late 8th – 11th        | lubuskie             | Lubniewice          |
| 134. | Lubniewice, 9         | late 8th – mid 12      | lubuskie             | Lubniewice          |
| 135. | Lubrza, stan 42       | 9th – mid 10th         | lubuskie             | Lubrza              |
| 136. | Łącko, 5              | 7th – mid 10th         | kujawsko – pomorskie | Pakość              |
| 137. | Łekno, 3              | 9th – 14th             | wielkopolskie        | Wągrowiec           |
| 138. | Łubowo, 57            | 7th/10th – 11th/12th   | wielkopolskie        | loco                |
| 139. | Malbork               | 10th/11th – 13th       | pomorskie            | loco                |
| 140. | Mietlica, 2/3         | 7th – 11th             | kujawsko – pomorskie | Kruszwica           |
| 141. | Mietlica, 3           | 7th – 11th             | kujawsko – pomorskie | Kruszwica           |
| 142. | Mietlica, 4           | 7th – 11th             | kujawsko – pomorskie | Kruszwica           |
| 143. | Mietlica, 9           | 7th – 11th             | kujawsko – pomorskie | Kruszwica           |
| 144. | Międzyrzecz 1 – Zamek | late 8th – 13th        | lubuskie             | loco                |

| No   | Locality/site                 | Chronology              | Province              | Community          |
|------|-------------------------------|-------------------------|-----------------------|--------------------|
| 145. | Milicz                        | late 10th – 13th        | dolnośląskie          | loco               |
| 146. | Moraczewo, 1                  | mid 10th – 11th         | wielkopolskie         | Łubowo             |
| 147. | Mrówki                        | 13th/14th               | wielkopolskie         | Wilczyn            |
| 148. | Myślibórz, 1                  | 8th/9th – late 13th     | zachodniopomorskie    | loco               |
| 149. | Nakło nad Notecią             | 8th – 12th              | kujawsko – pomorskie  | loco               |
| 150. | Napole, 1                     | late 10th – 1 half 14th | kujawsko – pomorskie  | Kowalewo Pomorskie |
| 151. | Napole, 1B                    | late 7th – early 13th   | kujawsko – pomorskie  | Kowalewo Pomorskie |
| 152. | Napole, 6                     | late 7th – early 13th   | kujawsko – pomorskie  | Kowalewo Pomorskie |
| 153. | Naszacowice, 1                | 8th – 11th              | małopolskie           | Podegrodzie        |
| 154. | Nętno, 1                      | 10th – mid 11th         | zachodniopomorskie    | Drawsko Pomorskie  |
| 155. | Nętno, 1b                     | 10th – mid 11th         | zachodniopomorskie    | Drawsko Pomorskie  |
| 156. | Niemcza                       | 8th – 10th              | dolnośląskie          | loco               |
| 157. | Nowa Wieś, 12                 | 6th – 8th               | lubuskie              | Bledzew            |
| 158. | Nowiniec, 2                   | 9th – 10th              | lubuskie              | Łubsko             |
| 159. | Nowy Dworek, 10               | late 9th – early 10th   | lubuskie              | Świebodzin         |
| 160. | Nowy Dworek, 27               | mid 10th – mid 12th     | lubuskie              | Świebodzin         |
| 161. | Nowy Dworek, 7                | 7th/8th – 9th           | lubuskie              | Świebodzin         |
| 162. | Objezierze, 1                 | 9th – mid 11th          | wielkopolskie         | Oborniki           |
| 163. | Obrowo, 1                     | late 7th – mid 10th     | wschodniopomorskie    | Kęsowo             |
| 164. | Olsztyn Las Miejski, CIV      | 8th – 9th               | warmińsko – mazurskie | loco               |
| 165. | Opole – Ostrówek, 1           | 12th – 13th             | opolskie              | loco               |
| 166. | Osiek Rypiński, 1             | 12th                    | kujawsko – pomorskie  | Osiek              |
| 167. | Ostrów Lednicki – Rybitwy, 3a | 10th – 14th             | wielkopolskie         | Łubowo             |
| 168. | Ostrów Lednicki, 1            | 9th – 14th              | wielkopolskie         | Łubowo             |
| 169. | Ostrów Lednicki, 2            | 9th – 13th/14th         | wielkopolskie         | Łubowo             |
| 170. | Otanów 27                     | 10th – 11th             | zachodniopomorskie    | Myślibórz          |
| 171. | Otomin, 1                     | 9th – mid 10th          | pomorskie             | Kolbudy            |
| 172. | Owidz, 1                      | 9th – 12th              | pomorskie             | Starogard Gdański  |
| 173. | Parsęcko, 2                   | late 11th               | zachodniopomorskie    | Szczecinek         |

| No   | Locality/site                              | Chronology             | Province              | Community          |
|------|--------------------------------------------|------------------------|-----------------------|--------------------|
| 174. | Pelplin – Maciejewo                        | 8th – 9th              | pomorskie             | Pelplin            |
| 175. | Pęczniew, 3                                | 11th – 12th            | łódzkie               | loco               |
| 176. | Pień, 2                                    | late 10th – early 11th | kujawsko – pomorskie  | Dąbrowa Chełmińska |
| 177. | Pień, 9                                    | 10th/11th              | kujawsko – pomorskie  | Dąbrowa Chełmińska |
| 178. | Płochocin, 6                               | late 11 – mid 12th     | Kujawsko – pomorskie  | Warlubie           |
| 179. | Płochocinek, 14A                           | 11th – 12th            | Kujawsko – pomorskie  | Warlubie           |
| 180. | Płochocinek, 14B                           | late 11th – late 12th  | Kujawsko – pomorskie  | Warlubie           |
| 181. | Płock                                      | 9th – 13th             | mazowieckie           | loco               |
| 182. | Płońsk 7                                   | 11th – 13th            | mazowieckie           | loco               |
| 183. | Podgórze, 1                                | erally medieval        | lubelskie             | Chełm              |
| 184. | Podzamcze, 1                               | 9th – 13th             | pomorskie             | Kwidzyn            |
| 185. | Poganowo, 4                                | 11th – 12th            | warmińsko – mazurskie | Kętrzyn            |
| 186. | Połupin, 2                                 | 8th – 9th              | lubuskie              | Dąbie              |
| 187. | Poniec, 1                                  | late 10th – mid 11th   | wielkopolskie         | loco               |
| 188. | Powodów II, 5                              | mid10th – 12th         | łódzkie               | Wartkowice         |
| 189. | Poznań – Ostrów Tumski (Katedra)           | 10th – 11th            | wielkopolskie         | loco               |
| 190. | Poznań – Ostrów Tumski (ogród arcybiskupi) | late 11th – 12th       | wielkopolskie         | loco               |
| 191. | Poznań – Ostrów Tumski (Plac Katedralny)   | late10th – mid 11th    | wielkopolskie         | k. X – poł. XI w.  |
| 192. | Poznań – Ostrów Tumski, 10                 | mid 12th – 15th        | wielkopolskie         | loco               |
| 193. | Poznań – Ostrów Tumski, 17                 | half 10th – late 13th  | wielkopolskie         | loco               |
| 194. | Poznań – Ostrów Tumski, NMP                | 10th – 13th            | Wielkopolskie         | loco               |
| 195. | Poznań – Ostrów Tumski, ul. Posadzego 5    | half 10th – 15th       | wielkopolskie         | loco               |
| 196. | Poznań – Stary Rynek 43                    | 13th – 15th            | wielkopolskie         | loco               |
| 197. | Poznań – Stary Rynek 48                    | 13th – 15th            | wielkopolskie         | loco               |
| 198. | Poznań – Stary Rynek S                     | mid13th – 15th         | wielkopolskie         | loco               |
| 199. | Poznań – Śródka, 26                        | late 10 – 15th         | wielkopolskie         | loco               |
| 200. | Poznań – Zagórze (Alumnat)                 | 10th/11th – late 11th  | wielkopolskie         | loco               |

| No   | Locality/site                    | Chronology            | Province              | Community        |
|------|----------------------------------|-----------------------|-----------------------|------------------|
| 201. | Poznań, ul Garbary 75/77         | 11th/12th – 14th      | wielkopolskie         | loco             |
| 202. | Poznań, ul. Wieżowa 2 – 4        | 9th – 11th10          | wielkopolskie         | loco             |
| 203. | Poznań, ul. Wodna                | 14th – 15th           | wielkopolskie         | loco             |
| 204. | Poznań, ul. Wodna 13             | mid13th – 14th        | wielkopolskie         | loco             |
| 205. | Poznań, ul. Zagórze              | mid10th – late 13th   | wielkopolskie         | loco             |
| 206. | Poznań – Wilda 163               | 10th – 15th           | wielkopolskie         | loco             |
| 207. | Poznań – Wilda 164               | 10th – 14th           | wielkopolskie         | loco             |
| 208. | Póltusk, 1                       | late 13th – 14th      | mazowieckie           | loco             |
| 209. | Praslity, 21                     | 6th – 11th            | warmińsko – mazurskie | Nowe Miasto      |
| 210. | Pruszcz Gdański                  | late 10th – 11th      | pomorskie             | loco             |
| 211. | Przełazy, 6                      | late 9th – 12th       | lubuskie              | Lubrza           |
| 212. | Przemyśl, 83                     | mid 10th              | przemyskie            | loco             |
| 213. | Przytok, 1                       | late 8th – 1 half 9th | lubuskie              | Zabór            |
| 214. | Racot, 18                        | 8th – 12th            | wielkopolskie         | Kościan          |
| 215. | Racot, 25                        | 12th – 12th/13th      | wielkopolskie         | Kościan          |
| 216. | Radacz, 1                        | late 8th – mid 10th   | zachodniopomorskie    | Szczecinek       |
| 217. | Radacz, 2                        | late 9th – 80. 10     | zachodniopomorskie    | Szczecinek       |
| 218. | Radłowice, 22                    | early medieval        | dolnośląskie          | Domaniów         |
| 219. | Radom, 2                         | 8th – 12th            | mazowieckie           | loco             |
| 220. | Radzim, 1                        | 9th/10th – mid 14th   | wielkopolskie         | Murowana Goślina |
| 221. | Robity, 3                        | early medieval        | warmińsko – mazurskie | Pasłęk           |
| 222. | Rudki                            | 9th – mid 10th        | wielkopolskie         | Szamotuły        |
| 223. | Ruska Wieś, 13                   | 10 – 12th/13th        | warmińsko – mazurskie | Mrażowo          |
| 224. | Ryczyn                           | late10th – 11th/12th  | dolnośląskie          | Oława            |
| 225. | Ryczyn Duży                      | 10 – 13th             | dolnośląskie          | Oława            |
| 226. | Ryczyn Mały                      | 9th – 12th            | dolnośląskie          | Oława            |
| 227. | Ryczyn, 1                        | late 10th – 13th      | dolnośląskie          | Oława            |
| 228. | Rzymówka                         | 8th – 11th            | dolnośląskie          | Złotoryja        |
| 229. | Sandomierz Collegium Gostomianum | early medieval        | świętokrzyskie        | loco             |



| No   | Locality/site         | Chronology             | Province              | Community  |
|------|-----------------------|------------------------|-----------------------|------------|
| 230. | Sandomierz, 1         | 10th – 13th            | świętokrzyskie        | loco       |
| 231. | Sandomierz – Zamek II | late 8th – mid 13th    | świętokrzyskie        | loco       |
| 232. | Santok, 1             | late 8th – mid 13th    | lubuskie              | loco       |
| 233. | Sąsiadka              | 11th                   | lubelskie             | Sułów      |
| 234. | Siemowo, 1            | 7th/8th – 10th         | wielkopolskie         | Gostyń     |
| 235. | Sieradz, 1            | 11th                   | łódzkie               | loco       |
| 236. | Skarszewy             | 9th – 10th             | pomorskie             | Skarszewy  |
| 237. | Skęczniew             | 8th – 13th             | wielkopolskie         | Dobra      |
| 238. | Słoszewy, 1           | late 14th – mid 15th   | kujawsko – pomorskie  | Bobrowo    |
| 239. | Słupsk, 1             | 7th – 12th             | pomorskie             | loco       |
| 240. | Słupsk, 3             | 13th/14th              | pomorskie             | loco       |
| 241. | Sopot, 1              | 8th – mid 10th         | pomorskie             | loco       |
| 242. | Splawie, 1            | late 10th              | wielkopolskie         | Kołaczkowo |
| 243. | Splawie, 2            | 9th – mid 10th         | wielkopolskie         | Kołaczkowo |
| 244. | Stare Drawsko (gród)  | 9th – 15th             | zachodniopomorskie    | Czaplinek  |
| 245. | Stargard – Osetno     | late 8th – mid 9th     | zachodniopomorskie    | loco       |
| 246. | Stargard – podgrodzie | mid 9th – late 13th    | zachodniopomorskie    | loco       |
| 247. | Stargard, 11a         | late 13th – early 15th | zachodniopomorskie    | loco       |
| 248. | Stargard, 11a         | 10th – 12th            | zachodniopomorskie    | loco       |
| 249. | Starorypin, 1A        | late 11th – mid 13th   | kujawsko – pomorskie  | Rypin      |
| 250. | Starorypin, 1B        | late 13th – early 14th | kujawsko – pomorskie  | Rypin      |
| 251. | Starorypin, 3         | late 11th – 14th       | kujawsko – pomorskie  | Rypin      |
| 252. | Starorypin, 4         | mid 11th – early 12th  | kujawsko – pomorskie  | Rypin      |
| 253. | Stary Zamek, 6        | 8th – 9th              | dolnośląskie          | Sobótka    |
| 254. | Staświny, 1           | 10th – 13th            | warmińsko – mazurskie | Miłki      |
| 255. | Stołpie, 1            | 13th                   | lubelskie             | Chełm      |
| 256. | Strachów              | late 10th/11th         | dolnośląskie          | Sobótka    |
| 257. | Stradów, 1            | late 9th – mid 11th    | świętokrzyskie        | Czarnocin  |
| 258. | Suchy Las, 12         | late 10th – mid 13th   | wielkopolskie         | loco       |

| No   | Locality/site                | Chronology             | Province              | Community           |
|------|------------------------------|------------------------|-----------------------|---------------------|
| 259. | Suchy Las, 6                 | late 10th – mid 14th   | wielkopolskie         | loco                |
| 260. | Sypniewo                     | 10th/11th              | mazowieckie           | loco                |
| 261. | Sypniewo, 1                  | early 10th – late 11th | mazowieckie           | loco                |
| 262. | Szarlej, 5                   | 9th                    | kujawsko – pomorskie  | Kruszwica           |
| 263. | Szczecin – Mścięcino         | 9th – 12th             | zachodniopomorskie    | loco                |
| 264. | Szczecin – Podzamcze         | 11th/12th – 13th       | zachodniopomorskie    | loco                |
| 265. | Szczecin – Rynek warzywny    | 10th – mid 13th        | zachodniopomorskie    | loco                |
| 266. | Szczecin – Stare Miasto, VI  | 9th – 13th             | zachodniopomorskie    | loco                |
| 267. | Szczecin – Zamek, wp IV – V  | 7th – 13th             | zachodniopomorskie    | loco                |
| 268. | Szczecin (Wzgórze zamkowe)   | late 12th – 13th       | zachodniopomorskie    | loco                |
| 269. | Szczecin, 6 (E, W suburbium) | 11th – mid 13th        | zachodniopomorskie    | loco                |
| 270. | Szczuka, 1                   | late 11th – mid 12th   | kujawsko – pomorskie  | Brodnica            |
| 271. | Szeligi, 1                   | 6th – 7th              | mazowieckie           | Ożarów Mazowiecki   |
| 272. | Szeligi, 2a                  | 6th – 7th              | mazowieckie           | Ożarów Mazowiecki   |
| 273. | Szeligi, 2b                  | 6th – 7th              | mazowieckie           | Ożarów Mazowiecki   |
| 274. | Szestno, 3                   | 10th/11th              | warmińsko – mazurskie | Mrągowo             |
| 275. | Szurpiły                     | 9th – 13th             | podlaskie             | Jeleniewo           |
| 276. | Świelubie, 1                 | 7th – 9th/10th         | zachodniopomorskie    | Dygowo              |
| 277. | Tarnawa, 1                   | mid 9th – mid 10th     | lubuskie              | Rzepin              |
| 278. | Tądów Dolny, 2               | late 11 – 13th         | łódzkie               | Warta               |
| 279. | Topolno                      | 10th – 13th            | kujawsko – pomorskie  | Pruszcz             |
| 280. | Toruń – Zamek, 1             | 10th – 13th            | warmińsko – mazurskie | loco                |
| 281. | Truszki Zalesie, 3 – 4       | 9th/10th – 11th/12th   | podlaskie             | Kolno               |
| 282. | Trzcianka                    | 11th – 13th            | podlaskie             | Janów               |
| 283. | Trzemsze                     | 13th/14th              | wielkopolskie         | Dobra               |
| 284. | Tum k. Łęczycy, 1            | late 10th – mid 14th   | łódzkie               | Góra Św. Małgorzaty |
| 285. | Tykocin, 1 – 2               | 12th – 13th            | podlaskie             | loco                |
| 286. | Tyłowo                       | 9th                    | pomorskie             | Krokowa             |
| 287. | Ujście, 1                    | late 10th – 15th       | wielkopolskie         | loco                |

| No   | Locality/site                     | Chronology            | Province              | Community       |
|------|-----------------------------------|-----------------------|-----------------------|-----------------|
| 288. | Ujście, 5                         | 10th – 14th           | wielkopolskie         | loco            |
| 289. | Warszawa – Wilanów, 13            | 11th/12th – 13th      | mazowieckie           | loco            |
| 290. | Węgry, 1                          | 11th/12th             | pomorskie             | Sztum           |
| 291. | Wielowieś Ołobok, 23              | 10th – 13th           | wielkopolskie         | Sieroszewice    |
| 292. | Wierzchaczewo, 2                  | 12th                  | wielkopolskie         | Kaźmierz        |
| 293. | Więcbork                          | 8th – early 12th      | kujawsko – pomorskie  | loco            |
| 294. | Wiślica                           | 10th – 13th           | świętokrzyskie        | loco            |
| 295. | Włocławek, 1                      | 9th – 12th            | kujawsko – pomorskie  | loco            |
| 296. | Wola Siennicka, 9                 | 8th – 11th            | lubelskie             | Siennica Różana |
| 297. | Wolin – miasto, 1/4 – 5           | 9th – 13th            | zachodniopomorskie    | Wolin           |
| 298. | Wolin – Przedmieście, 2           | 10th – 13th           | zachodniopomorskie    | Wolin           |
| 299. | Wolin – Srebrne Wzgórze, 5/I – II | 11th – 13th           | zachodniopomorskie    | Wolin           |
| 300. | Wolin (Srebrne wzgórze)           | 9th – 13th            | zachodniopomorskie    | loco            |
| 301. | Wolin, 1                          | 9th – 13th            | zachodniopomorskie    | loco            |
| 302. | Wolin, 10 (Osada południowa)      | 9th – 13th            | zachodniopomorskie    | loco            |
| 303. | Wolin, 2 (Przedmieście S)         | 10th – 13th           | zachodniopomorskie    | loco            |
| 304. | Wolin, 3                          | 10th – mid 11th       | zachodniopomorskie    | loco            |
| 305. | Wolin, 4 (Ogrody)                 | 9th – 13th            | zachodniopomorskie    | loco            |
| 306. | Wolin, 5                          | 9th – 14th            | zachodniopomorskie    | loco            |
| 307. | Wrocław, 1 (Ostrów Tumski)        | late 10th – 13th      | dolnośląskie          | loco            |
| 308. | Wrocław, Nowy Targ                | 12th – 14th           | dolnośląskie          | loco            |
| 309. | Wrocław, Ołbin                    | 11th – 12th           | dolnośląskie          | loco            |
| 310. | Zawada, 1                         | 9th – 11th            | lubuskie              | Zielona Góra    |
| 311. | Złotów, 3                         | 8th – early 14th      | wielkopolskie         | loco            |
| 312. | Zwiniarz, 1                       | 12th – 12th/13th      | warmińsko – mazurskie | Grodziczno      |
| 313. | Żmijewo, 3 – 4                    | 7th – 8th             | kujawsko – pomorskie  | Zbiczno         |
| 314. | Żółte, 1B                         | late 10th – 10th/11th | zachodniopomorskie    | Drawsko         |
| 315. | Żółte, 33                         | late 10th – 11th/12th | zachodniopomorskie    | Drawsko         |
| 316. | Żółwin, 29                        | 6th – 8th             | lubuskie              | Zwierzyn        |

| No   | Locality/site | Chronology | Province     | Community |
|------|---------------|------------|--------------|-----------|
| 317. | Żukowice, 1   | 6th – 7th  | dolnośląskie | loco      |
| 318. | Żukowice, 9   | 6th – 7th  | dolnośląskie | loco      |
